# Supplementary material for: AbsIDconvert: An absolute approach for converting genetic identifiers at different granularities
Source: PubMed Central journal article supplement (PMC3554462; doi:10.1186/1471-2105-13-229), 2012-09-12
Supplement: 1471-2105-13-229-S1.pdf [file 1471-2105-13-229-S1.pdf]

**Table S1: Entrez IDs converted to gene symbols uniquely by AbsIDconvert.**

| <b>EntrezID</b> | <b>Gene symbol (NCBI)</b> | <b>Gene type (NCBI)</b> | <b>Gene symbol (AbsIDconvert)</b>   |
|-----------------|---------------------------|-------------------------|-------------------------------------|
| 100505607       | LOC100505607              | miscRNA                 | LOC100505607                        |
| 100505645       | LOC100505645              | miscRNA                 | LOC100505645                        |
| 100505920       | LOC100505920              | miscRNA                 | LOC100505920                        |
| 100505938       | LOC100505938              | miscRNA                 | LOC100505938                        |
| 100505950       | LOC100505950              | miscRNA                 | LOC100505950                        |
| 100506044       | LOC100506044              | miscRNA                 | LOC100506044                        |
| 100506122       | LOC100506122              | miscRNA                 | LOC100506122                        |
| 100506123       | LOC100506123              | miscRNA                 | LOC100506123                        |
| 100506130       | LOC100506130              | miscRNA                 | LOC100506130                        |
| 100506158       | LOC100506158              | miscRNA                 | LOC100506158                        |
| 100506192       | LOC100506192              | miscRNA                 | LOC100506192                        |
| 100506272       | LOC100506272              | miscRNA                 | LOC100506272                        |
| 100506329       | LOC100506329              | miscRNA                 | LOC100506329                        |
| 100506351       | LOC100506351              | miscRNA                 | LOC100506351                        |
| 100506452       | LOC100506452              | miscRNA                 | LOC100506452                        |
| 100506609       | LOC100506609              | miscRNA                 | LOC100506609                        |
| 100506695       | LOC100506695              | miscRNA                 | PHF21B, LOC100506695                |
| 100506837       | LOC100506837              | miscRNA                 | LOC100506837                        |
| 100507153       | LOC100507153              | miscRNA                 | LOC100507153                        |
| 100507205       | LOC100507205              | miscRNA                 | LOC100507205                        |
| 100507389       | LOC100507389              | miscRNA                 | LOC100507389                        |
| 100507581       | LOC100507581              | miscRNA                 | LOC100507581                        |
| 100507615       | LOC100507615              | miscRNA                 | LOC100507615                        |
| 100507672       | LOC100507672              | miscRNA                 | PPARD, LOC100507672                 |
| 100529145       | TEN1-CDK3                 | miscRNA                 | C17ORF106-CDK3, TEN1, CDK3          |
| 100529211       | C17orf61-PLSCR3           | miscRNA                 | C17ORF61-PLSCR3, PLSCR3, C17ORF61   |
| 100630923       | LOC100630923              | miscRNA                 | LOC100630923, LOC100289561, PRKRIP1 |
| 100652780       | LOC100652780              | other                   | LOC100652780                        |
| 100329135       | LOC100329135              | protein-coding          | LOC100329135                        |
| 100505549       | LOC100505549              | protein-coding          | LOC100505549                        |
| 100507421       | LOC100507421              | protein-coding          | LOC100507421, LOC100130169          |
| 100652826       | LOC100652826              | protein-coding          | LOC100652826                        |
| 100303743       | LOC100303743              | pseudo                  | WVOX, LOC100303743                  |
| 100418753       | LOC100418753              | pseudo                  | LOC100418753                        |
| 100418754       | LOC100418754              | pseudo                  | LOC100418754                        |
| 100418951       | LOC100418951              | pseudo                  | LOC100418951                        |
| 100418955       | LOC100418955              | pseudo                  | LOC100418955                        |
| 100419014       | LOC100419014              | pseudo                  | LOC100419014                        |
| 100419017       | LOC100419017              | pseudo                  | LOC100419017                        |
| 100419108       | LOC100419108              | pseudo                  | RBMS1, LOC100419108                 |
| 100419553       | LOC100419553              | pseudo                  | LOC100419553                        |
| 100419621       | LOC100419621              | pseudo                  | TADA2A, LOC100419621                |
| 100419694       | LOC100419694              | pseudo                  | LOC100419694                        |
| 100419779       | LOC100419779              | pseudo                  | LOC100419779                        |
| 100419814       | LOC100419814              | pseudo                  | CUL3, LOC100419814                  |

Continued on next page...

Table S1 – continued from previous page

| Entrez ID | Gene symbol (NCBI) | Gene type (NCBI) | Gene symbol (AbsIDconvert) |
|-----------|--------------------|------------------|----------------------------|
| 100419892 | LOC100419892       | pseudo           | LOC100419892               |
| 100419951 | LOC100419951       | pseudo           | LOC100419951               |
| 100419986 | LOC100419986       | pseudo           | LOC100419986               |
| 100420064 | LOC100420064       | pseudo           | LOC100420064               |
| 100420177 | LOC100420177       | pseudo           | LOC100420177               |
| 100420305 | LOC100420305       | pseudo           | LOC100420305               |
| 100420358 | LOC100420358       | pseudo           | LOC100420358               |
| 100420741 | LOC100420741       | pseudo           | LOC100420741               |
| 100420886 | LOC100420886       | pseudo           | WDR35, LOC100420886        |
| 100420949 | LOC100420949       | pseudo           | LOC100287225, LOC100420949 |
| 100421028 | LOC100421028       | pseudo           | LOC100421028               |
| 100421121 | LOC100421121       | pseudo           | LOC100421121               |
| 100421437 | LOC100421437       | pseudo           | ZNF148, LOC100421437       |
| 100421471 | LOC100421471       | pseudo           | LOC100421471               |
| 100421494 | LOC100421494       | pseudo           | LOC100421494               |
| 100421695 | LOC100421695       | pseudo           | LOC100421695               |
| 100422265 | LOC100422265       | pseudo           | LOC100422265               |
| 100422284 | LOC100422284       | pseudo           | LOC100422284               |
| 100422299 | LOC100422299       | pseudo           | LOC100422299               |
| 100422510 | LOC100422510       | pseudo           | LOC100422510               |
| 100422524 | LOC100422524       | pseudo           | MLLT10, LOC100422524       |
| 100422671 | LOC100422671       | pseudo           | LOC100422671               |
| 100500934 | LOC100500934       | pseudo           | LOC100500934               |
| 100507388 | LOC100507388       | pseudo           | LOC100505505, LOC100507388 |
| 100507595 | LOC100507595       | pseudo           | LRRC33, LOC100507595       |
| 100526736 | LOC100526736       | pseudo           | LOC100526736               |
| 100533622 | LOC100533622       | pseudo           | LOC100533622               |
| 100533658 | LOC100533658       | pseudo           | LOC100533658               |
| 100533661 | LOC100533661       | pseudo           | LOC100533661               |
| 100533663 | LOC100533663       | pseudo           | LOC100533663               |
| 100533732 | LOC100533732       | pseudo           | LOC100533732               |
| 100533846 | LOC100533846       | pseudo           | LOC100533846               |
| 100631258 | LOC100631258       | pseudo           | NELL1, LOC100631258        |
| 100652752 | LOC100652752       | pseudo           | LOC100652752               |
| 100652792 | LOC100652792       | pseudo           | LOC100652792               |
| 100505530 | FLJ45825           | unknown          | LOC100505530               |
| 100506282 | LOC100506282       | unknown          | LOC100506282               |
| 100506342 | LOC100506342       | unknown          | LOC100506342               |
