# Supplementary material for: AbsIDconvert: An absolute approach for converting genetic identifiers at different granularities
Source: PubMed Central journal article supplement (PMC3554462; doi:10.1186/1471-2105-13-229), 2012-09-12
Supplement: 1471-2105-13-229-S2.pdf [file 1471-2105-13-229-S2.pdf]

Table S2: Entrez IDs converted to gene symbol by HMS & ID, DAVID and MADGene missed by AbsIDConvert.

| EntrezID  | Gene symbol (NCBI) | Gene type (NCBI) | NCBI annotation                  | HMS & ID   | DAVID                           | MADGene      |
|-----------|--------------------|------------------|----------------------------------|------------|---------------------------------|--------------|
| 286750    | -                  | -                | replaced with Gene ID: 9414      | -          | DFNA51                          | DFNA51       |
| 5374      | -                  | -                | replaced with Gene ID: 390831    | -          | PMM2P1                          | PMM2P1       |
| 728795    | -                  | -                | replaced with Gene ID: 100420746 | -          | LOC728795                       | hCG_1644355  |
| 493620    | -                  | -                | replaced with Gene ID: 100418887 | -          | TAGLN2P1                        | TAGLN2P1     |
| 645128    | -                  | -                | replaced with Gene ID: 100288486 | -          | LOC645128                       | LOC645128    |
| 100507343 | CPB2-AS1           | miscRNA          | Not on current assembly          | CPB2-AS1   | -                               | -            |
| 100129836 | COL4A2-AS2         | miscRNA          | Not on current assembly          | COL4A2-AS2 | LOC100129836                    | LOC100129836 |
| 57234     | FAM91A2            | miscRNA          | Not on current assembly          | FAM91A2    | FAM91A2                         | FAM91A2      |
| 693204    | MIR619             | miscRNA          | Not on current assembly          | MIR619     | MIR619                          | MIR619       |
| 729634    | KRT18P26           | pseudo           | Not on current assembly          | KRT18P26   | KRT18P19,<br>KRT18,<br>KRT18P26 | KRT18P26     |
| 100189058 | TRNAQ9             | tRNA             | Not on current assembly          | TRNAQ9     | TRNAQ9                          | TRNAQ9       |
| 283486    | LINC00567          | unknown          | Not on current assembly          | LINC00567  | LOC283486                       | LOC283486    |
| 100131497 | LOC100131497       | miscRNA          | Not on current assembly          | -          | LOC100131497                    | LOC100131497 |
| 401021    | LOC401021          | miscRNA          | Not on current assembly          | -          | LOC401021                       | LOC401021    |
| 729683    | LOC729683          | miscRNA          | Not on current assembly          | -          | LOC729683                       | LOC729683    |
| 100288085 | DYZ1L5             | other            | Not on current assembly          | -          | LOC100288085                    | LOC100288085 |
| 100131004 | LOC100131004       | protein-coding   | Not on current assembly          | -          | LOC100131004                    | LOC100131004 |
| 100131310 | LOC100131310       | protein-coding   | Not on current assembly          | -          | LOC100131310                    | LOC100131310 |
| 100132365 | LOC100132365       | protein-coding   | Not on current assembly          | -          | LOC100132365                    | LOC100132365 |
| 100286906 | LOC100286906       | protein-coding   | Not on current assembly          | -          | LOC100286906                    | LOC100286906 |
| 100289058 | LOC100289058       | protein-coding   | Not on current assembly          | -          | LOC100289058                    | LOC100289058 |

Continued on next page...

Table S2 – continued from previous page

| Entrez ID | Gene symbol (NCBI) | Gene type (NCBI) | NCBI annotation                  | HMS & ID     | DAVID                                                                                                                                                      | MADGene      |
|-----------|--------------------|------------------|----------------------------------|--------------|------------------------------------------------------------------------------------------------------------------------------------------------------------|--------------|
| 653541    | LOC653541          | protein-coding   | Not on current assembly          | -            | LOC399839, HPX-2, LOC728410, LOC653541, LOC653548, LOC653544, LOC653543, LOC653545, LOC440014, LOC440013, LOC441056, LOC728022, DUX4, LOC652119, LOC440017 | LOC653541    |
| 727961    | LOC727961          | protein-coding   | Not on current assembly          | -            | LOC727961                                                                                                                                                  | hCG_1776047  |
| 100128019 | LOC100128019       | unknown          | Not on current assembly          | -            | LOC100128019                                                                                                                                               | LOC100128019 |
| 100129894 | LOC100129894       | unknown          | Not on current assembly          | -            | LOC100129894                                                                                                                                               | LOC100129894 |
| 100131043 | LOC100131043       | unknown          | Not on current assembly          | -            | LOC100131043                                                                                                                                               | LOC100131043 |
| 100288869 | LOC100288869       | unknown          | Not on current assembly          | -            | LOC100288869                                                                                                                                               | LOC100288869 |
| 400943    | LOC400943          | unknown          | Not on current assembly          | -            | UNQ5830                                                                                                                                                    | UNQ5830      |
| 440479    | FLJ34223           | unknown          | Not on current assembly          | -            | FLJ34223                                                                                                                                                   | FLJ34223     |
| 645895    | LOC645895          | unknown          | Not on current assembly          | -            | LOC645895                                                                                                                                                  | LOC645895    |
| 645967    | LOC645967          | unknown          | Not on current assembly          | -            | LOC645967                                                                                                                                                  | LOC645967    |
| 648149    | LOC648149          | unknown          | Not on current assembly          | -            | LOC648149                                                                                                                                                  | LOC648149    |
| 727799    | LOC727799          | unknown          | Not on current assembly          | -            | LOC727799                                                                                                                                                  | LOC727799    |
| 693128    | MIR548B            | miscRNA          | Not annot. on reference assembly | MIR548B      | MIR548B                                                                                                                                                    | MIR548B      |
| 28332     | IGHD2OR15-2B       | other            | Not annot. on reference assembly | IGHD2OR15-2B | IGHD2OR15-2B                                                                                                                                               | IGHD2OR15-2B |
| 3506      | IGHJ@              | other            | Not annot. on reference assembly | IGHJ@        | IGHJ@                                                                                                                                                      | IGHJ@        |
| 100313795 | PIRC73             | other            | Not annot. on reference assembly | PIRC73       | -                                                                                                                                                          | -            |
| 100313815 | PIRC54             | other            | Not annot. on reference assembly | PIRC54       | -                                                                                                                                                          | -            |
| 28301     | IGHV3OR16-15       | pseudo           | Not annot. on reference assembly | IGHV3OR16-15 | IGHV3OR16-15                                                                                                                                               | IGHV3OR16-15 |
| 28854     | IGKV3OR2-5         | pseudo           | Not annot. on reference assembly | IGKV3OR2-5   | IGKV3OR2-5                                                                                                                                                 | IGKV3OR2-5   |

Continued on next page...

Table S2 – continued from previous page

| Entrez ID | Gene symbol (NCBI) | Gene type (NCBI) | NCBI annotation                  | HMS & ID   | DAVID         | MADGene       |
|-----------|--------------------|------------------|----------------------------------|------------|---------------|---------------|
| 28861     | IGKV2OR2-1         | pseudo           | Not annot. on reference assembly | IGKV2OR2-1 | IGKV2OR2-1    | IGKV2OR2-1    |
| 4699      | NDUFA5P1           | pseudo           | Not annot. on reference assembly | NDUFA5P1   | NDUFA5P1      | NDUFA5P1      |
| 654813    | P2RY10P1           | pseudo           | Not annot. on reference assembly | P2RY10P1   | P2RY10P1      | P2RY10P1      |
| 100189517 | TRNAN35            | tRNA             | Not annot. on reference assembly | TRNAN35    | TRNAN35P      | TRNAN35P      |
| 25784     | DGCR12             | unknown          | Not annot. on reference assembly | DGCR12     | DGCR12        | DGCR12        |
| 3405      | IDDM6              | unknown          | Not annot. on reference assembly | IDDM6      | IDDM6         | IDDM6         |
| 4375      | MRX11              | unknown          | Not annot. on reference assembly | MRX11      | MRX11         | MRX11         |
| 554188    | FCMTE2             | unknown          | Not annot. on reference assembly | FCMTE2     | FCMTE2        | FCMTE2        |
| 594832    | MYP11              | unknown          | Not annot. on reference assembly | MYP11      | MYP11         | MYP11         |
| 6893      | TAPVR1             | unknown          | Not annot. on reference assembly | TAPVR1     | TAPVR1        | TAPVR1        |
| 7889      | PSORS3             | unknown          | Not annot. on reference assembly | PSORS3     | PSORS3        | PSORS3        |
| 882       | CCAL1              | unknown          | Not annot. on reference assembly | CCAL1      | CCAL1         | CCAL1         |
| 89760     | MRX75              | unknown          | Not annot. on reference assembly | MRX75      | MRX75         | MRX75         |
| 100302562 | MENAQ2             | unknown          | Not annot. on reference assembly | -          | -             | MENAQ2        |
| 400579    | FLJ35934           | miscRNA          | Not annot. on reference assembly | -          | FLJ35934      | FLJ35934      |
| 286009    | LOC286009          | other            | Not annot. on reference assembly | -          | LOC286009     | tcag7.929     |
| 387281    | LCRB               | other            | Not annot. on reference assembly | -          | LCRB          | LCRB          |
| 402469    | LOC402469          | other            | Not annot. on reference assembly | -          | LOC402469     | tcag7.1056    |
| 26101     | DKFZP564M1462      | protein-coding   | Not annot. on reference assembly | -          | DKFZP564M1462 | DKFZP564M1462 |
| 283911    | LOC283911          | protein-coding   | Not annot. on reference assembly | -          | LOC283911     | LOC283911     |
| 55547     | HAB1               | protein-coding   | Not annot. on reference assembly | -          | HAB1          | HAB1          |
| 653486    | LOC653486          | protein-coding   | Not annot. on reference assembly | -          | LOC653486     | hCG_1741344   |
| 100133452 | LOC100133452       | pseudo           | Not annot. on reference assembly | -          | LOC100133452  | LOC100133452  |
| 100292981 | LOC100292981       | pseudo           | Not annot. on reference assembly | -          | LOC100292981  | LOC100292981  |
| 100294336 | LOC100294336       | pseudo           | Not annot. on reference assembly | -          | LOC100294336  | LOC100294336  |
| 647349    | LOC647349          | pseudo           | Not annot. on reference assembly | -          | LOC647349     | LOC647349     |
| 652073    | LOC652073          | pseudo           | Not annot. on reference assembly | -          | LOC652073     | LOC652073     |
| 730535    | LOC730535          | pseudo           | Not annot. on reference assembly | -          | LOC730535     | LOC730535     |
| 100049541 | STUT1              | unknown          | Not annot. on reference assembly | -          | STUT1         | STUT1         |
| 100134822 | LOC100134822       | unknown          | Not annot. on reference assembly | -          | LOC100134822  | LOC100134822  |

Continued on next page...

Table S2 – continued from previous page

| Entrez ID | Gene symbol (NCBI) | Gene type (NCBI) | NCBI annotation                  | HMS & ID | DAVID        | MADGene      |
|-----------|--------------------|------------------|----------------------------------|----------|--------------|--------------|
| 100188748 | STHAG5             | unknown          | Not annot. on reference assembly | -        | STHAG5       | STHAG5       |
| 100188844 | MAFD6              | unknown          | Not annot. on reference assembly | -        | MAFD6        | MAFD6        |
| 100188852 | SHEP8              | unknown          | Not annot. on reference assembly | -        | SHEP8        | SHEP8        |
| 100188853 | BMND7              | unknown          | Not annot. on reference assembly | -        | BMND7        | BMND7        |
| 100190985 | IS5                | unknown          | Not annot. on reference assembly | -        | IS5          | IS5          |
| 100271922 | BFIC4              | unknown          | Not annot. on reference assembly | -        | BFIC4        | BFIC4        |
| 100293044 | LOC100293044       | unknown          | Not annot. on reference assembly | -        | LOC100293044 | LOC100293044 |
| 338030    | GLM1               | unknown          | Not annot. on reference assembly | -        | GLM1         | GLM1         |
| 414058    | ACRPV              | unknown          | Not annot. on reference assembly | -        | ACRPV        | ACRPV        |
| 474225    | RA5                | unknown          | Not annot. on reference assembly | -        | RA5          | RA5          |
| 474261    | BP15               | unknown          | Not annot. on reference assembly | -        | BP15         | BP15         |
| 474285    | OA1                | unknown          | Not annot. on reference assembly | -        | OA1          | GPR143       |
| 474294    | BW19               | unknown          | Not annot. on reference assembly | -        | BW19         | BW19         |
| 474295    | BW20               | unknown          | Not annot. on reference assembly | -        | BW20         | BW20         |
| 50989     | HMSNO              | unknown          | Not annot. on reference assembly | -        | HMSNO        | HMSNO        |
| 544599    | AASTH45            | unknown          | Not annot. on reference assembly | -        | AASTH45      | AASTH45      |
| 544616    | COHEN2             | unknown          | Not annot. on reference assembly | -        | COHEN2       | COHEN2       |
| 780911    | TQDS               | unknown          | Not annot. on reference assembly | -        | TQDS         | TQDS         |
| 780925    | CHMRQ              | unknown          | Not annot. on reference assembly | -        | CHMRQ        | CHMRQ        |
| 7834      | PCAP               | unknown          | Not annot. on reference assembly | -        | PCAP         | PCAP         |
| 8008      | BDMF               | unknown          | Not annot. on reference assembly | -        | BDMF         | BDMF         |
| 8041      | TP250              | unknown          | Not annot. on reference assembly | -        | TP250        | TP250        |
| 8173      | CNSN               | unknown          | Not annot. on reference assembly | -        | CNSN         | CNSN         |
| 8205      | TAM                | unknown          | Not annot. on reference assembly | -        | TAM          | TAM          |
