# Supplementary material for: AbsIDconvert: An absolute approach for converting genetic identifiers at different granularities
Source: PubMed Central journal article supplement (PMC3554462; doi:10.1186/1471-2105-13-229), 2012-09-12
Supplement: 1471-2105-13-229-S3.pdf [file 1471-2105-13-229-S3.pdf]

**Table S3: Entrez IDs converted to Refseq by MADGene missed by AbsIDConvert.**

| <b>EntrezID</b> | <b>RefSeq (NCBI)</b> | <b>MADGene</b> | <b>DAVID</b>                                           | <b>Onto-Translate</b> |
|-----------------|----------------------|----------------|--------------------------------------------------------|-----------------------|
| 6080            | NR_002907            | NR_002907      | NR_004385, NR_004404, NR_004386, NR_004406, NR_002907, | NR_002907             |
| 26822           | NR_000022            | NR_000022      | NR_001452, NR_001453, NR_000022, NR_001454, NR_003125, | NR_000022             |
| 100302146       | NR_031634            | NR_031634      | -                                                      | -                     |
| 100302193       | NR_031656            | NR_031656      | -                                                      | -                     |
| 100302167       | NR_031629            | NR_031629      | NR_031629                                              | -                     |
