# Supplementary material for: AbsIDconvert: An absolute approach for converting genetic identifiers at different granularities
Source: PubMed Central journal article supplement (PMC3554462; doi:10.1186/1471-2105-13-229), 2012-09-12
Supplement: 1471-2105-13-229-S4.pdf [file 1471-2105-13-229-S4.pdf]

**Table S4: Genomic intervals found by AbsIDconvert for the five unmapped Entrez IDs found by MADGene.**

| Entrez ID | chromosome | start     | end       | width | strand |
|-----------|------------|-----------|-----------|-------|--------|
| 6080      | chr1       | 28833877  | 28834083  | 207   | +      |
| 26822     | chr11      | 17096200  | 17096291  | 92    | -      |
| 100302146 | chr20      | 49231173  | 49231322  | 150   | -      |
| 100302193 | chr4       | 102251459 | 102251571 | 113   | -      |
| 100302167 | chr9       | 69002239  | 69002321  | 83    | -      |
