# Supplementary material for: AbsIDconvert: An absolute approach for converting genetic identifiers at different granularities
Source: PubMed Central journal article supplement (PMC3554462; doi:10.1186/1471-2105-13-229), 2012-09-12
Supplement: 1471-2105-13-229-S5.pdf [file 1471-2105-13-229-S5.pdf]

**Table S5: Entrez IDs to RefSeq conversion by DAVID, with missing annotation from NCBI.**

| <b>EntrezID</b> | <b>DAVID</b>            | <b>NCBI Entrez annotation for DAVID RefSeq</b> |
|-----------------|-------------------------|------------------------------------------------|
| 100129552       | NM_001029               | 6231                                           |
| 285176          | NM_006013, NR_026898    | 6134                                           |
| 388474          | NM_000972               | 6130                                           |
| 440991          | NM_001005               | 6188                                           |
| 642538          | NM_006333, NM_173177    | 10438                                          |
| 642585          | NM_003374               | 7416                                           |
| 644634          | NR_027002               | 388692                                         |
| 646050          | NM_022831               | 64853                                          |
| 653252          | NM_006327               | 100287932                                      |
| 727828          | NM_001164397            | 642446                                         |
| 727984          | NM_001035006, NM_000985 | 6139, 6140                                     |
| 728513          | NM_032882               | 84968                                          |
| 728533          | NM_014761               | 9798                                           |
| 728698          | NM_001416, NR_002912    | 1973                                           |
| 728953          | NM_001022               | 6223                                           |
| 728970          | NM_025113               | 80183                                          |
| 729163          | NM_001444               | 2171                                           |
| 729458          | NM_144614               | 125997                                         |
| 729992          | NM_003932               | 6767                                           |
| 81458           | NM_001001824            | 403239                                         |
