# Supplementary material for: AbsIDconvert: An absolute approach for converting genetic identifiers at different granularities
Source: PubMed Central journal article supplement (PMC3554462; doi:10.1186/1471-2105-13-229), 2012-09-12
Supplement: 1471-2105-13-229-S6.pdf [file 1471-2105-13-229-S6.pdf]

**Table S6: Entrez IDs converted to RefSeq IDs exclusively by AbsIDconvert.**

| EntrezID  | RefSeq               | AbsIDconvert                                          |
|-----------|----------------------|-------------------------------------------------------|
| 81104     | -                    | NR_015416                                             |
| 100505905 | -                    | NM_001256876, NM_001256877                            |
| 400433    | -                    | NR_033787                                             |
| 100131381 | -                    | NR_029697                                             |
| 100652874 | -                    | NR_046251, NR_046252, NR_046253, NR_046254, NR_046255 |
| 100463488 | NM_001190708         | NM_001190708                                          |
| 100271846 | NM_001191055         | NM_001191055                                          |
| 642612    | NM_001195234         | NM_001195234                                          |
| 100507421 | NM_001195278         | NM_001195278                                          |
| 100287466 | NM_001242319         | NM_001242319, NM_032882                               |
| 100313837 | NR_031576            | NR_031576                                             |
| 100329109 | NR_033248            | NR_033248                                             |
| 647135    | NR_034178            | NR_034178                                             |
| 100422851 | NR_036200            | NR_036200                                             |
| 100422860 | NR_036251            | NR_036251                                             |
| 284648    | NR_036490            | NR_036490                                             |
| 100289373 | NR_036531, NR_036532 | NR_036531, NR_036532                                  |
| 100500878 | NR_037450            | NR_037450                                             |
| 100506548 | NR_037665            | NR_037665                                             |
| 100359394 | NR_037842            | NR_037842                                             |
| 100507582 | NR_037903            | NR_037903                                             |
| 100505687 | NR_038301, NR_038302 | NR_038301, NR_038302                                  |
| 554206    | NR_038379            | NR_038379                                             |
| 729444    | NR_038388            | NR_038388                                             |
| 100129464 | NR_038428            | NR_038428                                             |
| 253962    | NR_038439            | NR_038439                                             |
| 147093    | NR_038442            | NR_038442                                             |
| 284865    | NR_038460            | NR_038460                                             |
| 100507401 | NR_038909            | NR_038909                                             |
| 100506241 | NR_038954            | NR_038954                                             |
| 100616164 | NR_039616            | NR_039616                                             |
| 100616469 | NR_039627            | NR_039627                                             |
| 100616499 | NR_039634            | NR_039634, NR_039636                                  |
| 100616399 | NR_039635            | NR_039635                                             |
| 100616315 | NR_039942            | NR_039942                                             |
| 284395    | NR_040029            | NR_040029                                             |
| 81343     | NR_045005            | NR_045005                                             |
| 440519    | NR_045525            | NR_045525                                             |
