# Supplementary material for: AbsIDconvert: An absolute approach for converting genetic identifiers at different granularities
Source: PubMed Central journal article supplement (PMC3554462; doi:10.1186/1471-2105-13-229), 2012-09-12
Supplement: 1471-2105-13-229-S7.pdf [file 1471-2105-13-229-S7.pdf]

Table S7: Genomic intervals for AbsIDconvert Entrez to RefSeq conversion.

| chromosome | start    | end      | width | strand | name      | chromosome | start    | end      | width | strand | name         |
|------------|----------|----------|-------|--------|-----------|------------|----------|----------|-------|--------|--------------|
| chr15      | 22332368 | 22333348 | 981   | +      | 81104     | chr15      | 22332387 | 22332775 | 389   | +      | NR_015416    |
| chr9       | 540552   | 549535   | 8984  | +      | 100505905 | chr9       | 540507   | 540666   | 160   | +      | NM_001256876 |
| chr9       | 540552   | 549535   | 8984  | +      | 100505905 | chr9       | 549106   | 549720   | 615   | +      | NM_001256877 |
| chr15      | 85046982 | 85049663 | 2682  | +      | 400433    | chr15      | 85046594 | 85050248 | 3655  | +      | NR_033787    |
| chr11      | 43600529 | 43606151 | 5623  | +      | 100131381 | chr11      | 43602943 | 43603032 | 90    | +      | NR_020697    |
| chr3       | 14961857 | 14989931 | 28075 | -      | 100652874 | chr3       | 14984285 | 14987660 | 3376  | -      | NR_046252    |
| chr3       | 14961857 | 14989931 | 28075 | -      | 100652874 | chr3       | 14984285 | 14987660 | 3376  | -      | NR_046253    |
| chr3       | 14961857 | 14989931 | 28075 | -      | 100652874 | chr3       | 14984285 | 14987660 | 3376  | -      | NR_046254    |
| chr3       | 14961857 | 14989931 | 28075 | -      | 100652874 | chr3       | 14984285 | 14987660 | 3376  | -      | NR_046255    |
| chr3       | 14961857 | 14989931 | 28075 | -      | 100652874 | chr3       | 14984285 | 14987660 | 3376  | -      | NR_046251    |
| chr3       | 14961857 | 14989931 | 28075 | -      | 100652874 | chr3       | 1498593  | 14989011 | 419   | -      | NR_046252    |
| chr3       | 14961857 | 14989931 | 28075 | -      | 100652874 | chr3       | 14988616 | 14989011 | 396   | -      | NR_046253    |
| chr3       | 14961857 | 14989931 | 28075 | -      | 100652874 | chr3       | 14988620 | 14989011 | 392   | -      | NR_046254    |
| chr3       | 14961857 | 14989931 | 28075 | -      | 100652874 | chr3       | 14989245 | 14989399 | 155   | -      | NR_046255    |
| chr3       | 14961857 | 14989931 | 28075 | -      | 100652874 | chr3       | 14989519 | 14989947 | 429   | -      | NR_046251    |
