# Supplementary material for: AbsIDconvert: An absolute approach for converting genetic identifiers at different granularities
Source: PubMed Central journal article supplement (PMC3554462; doi:10.1186/1471-2105-13-229), 2012-09-12
Supplement: 1471-2105-13-229-S8.pdf [file 1471-2105-13-229-S8.pdf]

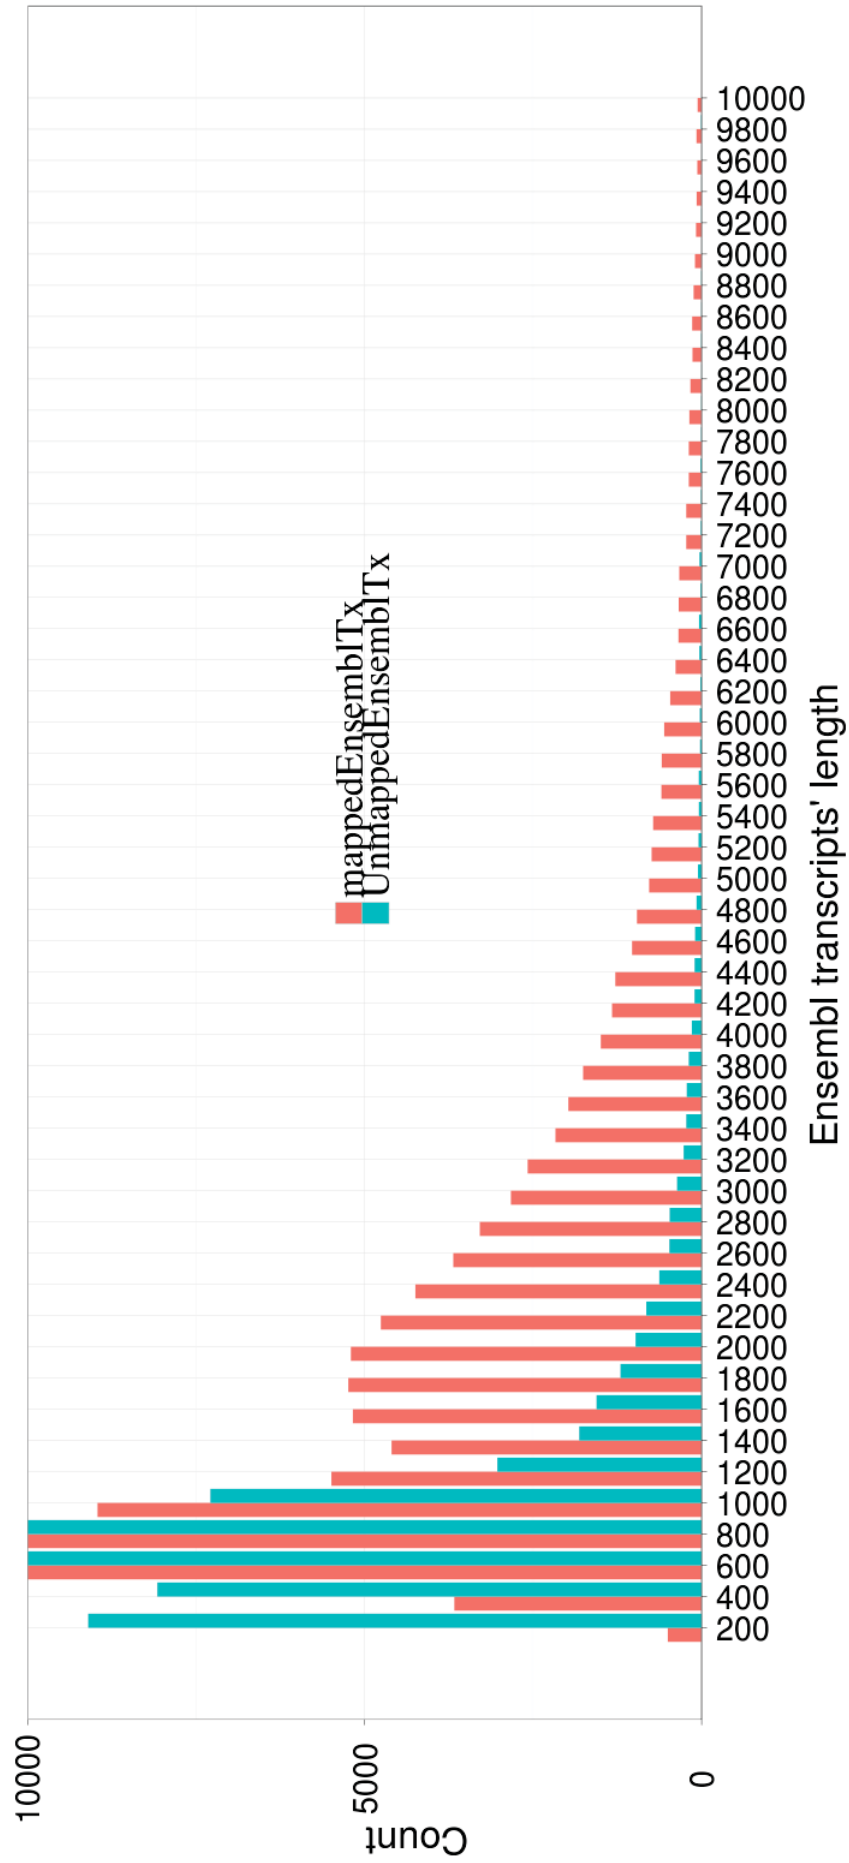

Figure S1: Case Study 3 - Ensembl transcript lengths mapped / unmapped by probes.
